# Supplementary material
Source: Springer Nature journal article supplement (https://www.springermedizin.de/resource/supplementary/12874_2012_991_MOESM4_ESM.pdf/9433018)
Supplement: MOESM4 [file 9433018]

| <b>Working Practices</b>                        |                                                                                                                                           |
|-------------------------------------------------|-------------------------------------------------------------------------------------------------------------------------------------------|
| Professional role                               | <i>Perception of own or other's roles, including empowerment, professional pride, GP commissioning, GPs with Special Interest (GPwSI)</i> |
| Relationship between primary and secondary care | <i>Barriers, gaps, advantages and drawbacks, working relationships</i>                                                                    |
| Knowledge and skills transfer                   | <i>Education, information, explanations, teaching, training (student doctors, GPwSI)</i>                                                  |
| Joined up working                               | <i>Instances of working together from two or more different disciplines, working across care sectors</i>                                  |
| Changes in working practices                    | <i>Impact / outcome in terms of changes to working practice (e.g. Saturday clinics), changes to clinician workload, consultant travel</i> |

| <b>Philosophy of Care</b>                |                                                                                                       |
|------------------------------------------|-------------------------------------------------------------------------------------------------------|
| Ideology of 'care closer to home' (CCTH) | <i>Attitude towards closer to home agenda and satellite clinic model</i>                              |
| Patient-centred approach                 | <i>Biopsychosocial &amp; holistic approaches, opportunities for health promotion, patient choice</i>  |
| Equivalence to hospital care             | <i>Comparisons with the hospital, e.g. trying to match standards of care</i>                          |
| Equity in service provision              | <i>Distribution of services, equity in access to services, postcode lottery, service distribution</i> |
